# Supplementary material for: Photoinduced electron doping of single-walled carbon nanotubes based on carboxamide photochemical reactions
Source: Royal Society of Chemistry journal article supplement (doi:10.1039/d2ta08131h), 2023-01-01
Supplement: d2ta08131h1.pdf [file d2ta08131h1.pdf]

## Electronic Supplementary Information

*for*

### **Photoinduced electron doping of single-walled carbon nanotubes based on carboxamide photochemical reactions**

*Naoki Tanaka, Taiki Ishii, Itsuki Yamaguchi, Aoi Hamasuna, Tsuyohiko Fujigaya\**

#### **Corresponding Author**

Tsuyohiko Fujigaya: [fujigaya.tsuyohiko.948@m.kyushu-u.ac.jp](mailto:fujigaya.tsuyohiko.948@m.kyushu-u.ac.jp)

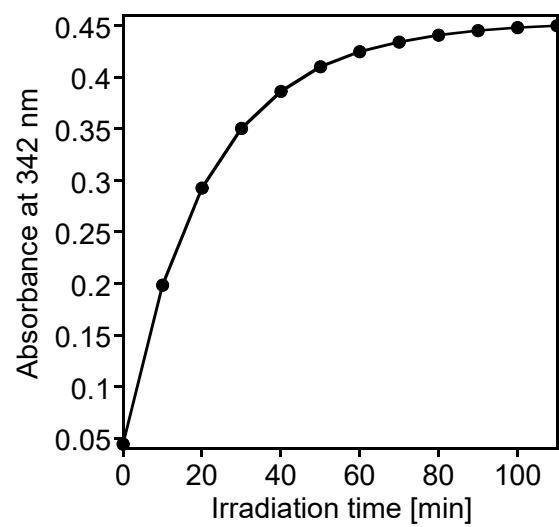

**Fig. S1** 254-nm UV irradiation time dependency of absorption peak intensities at 342 nm of ethanol solution of N-DMBI-Ox (0.02 mM).

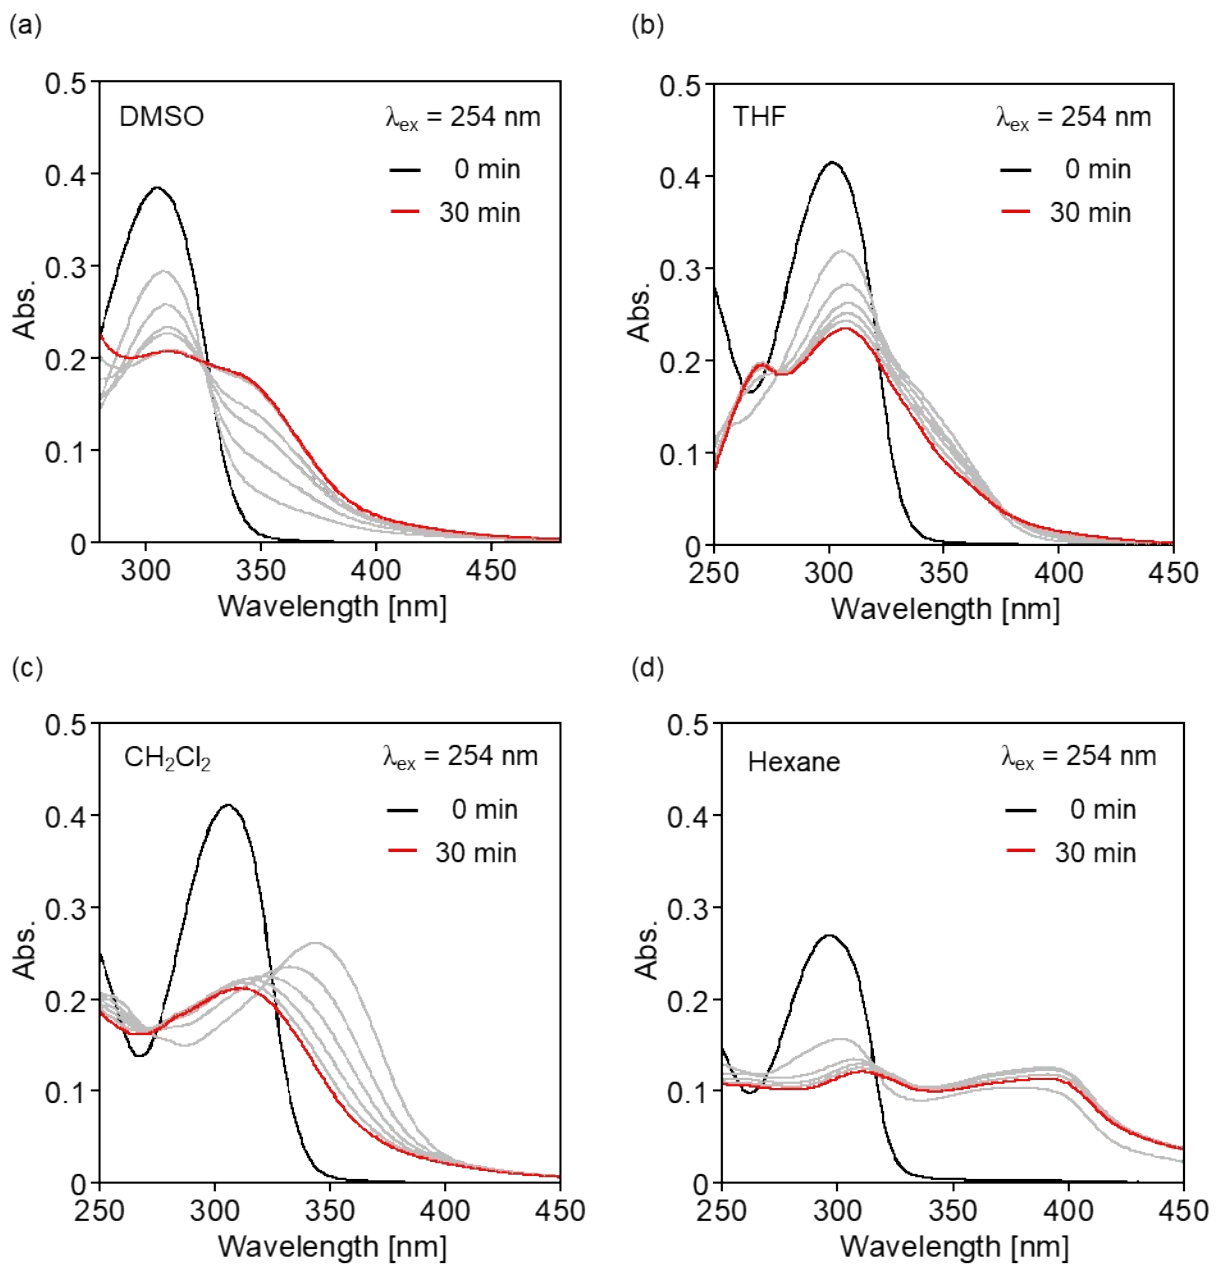

**Fig. S2** UV-vis absorption spectra of N-DMBI-Ox after UV irradiation with 254 nm in (a) DMSO (0.02 mM), (b) THF (0.02 mM), (c)  $\text{CH}_2\text{Cl}_2$  (0.02 mM), and (d) Hexane (0.01 mM).

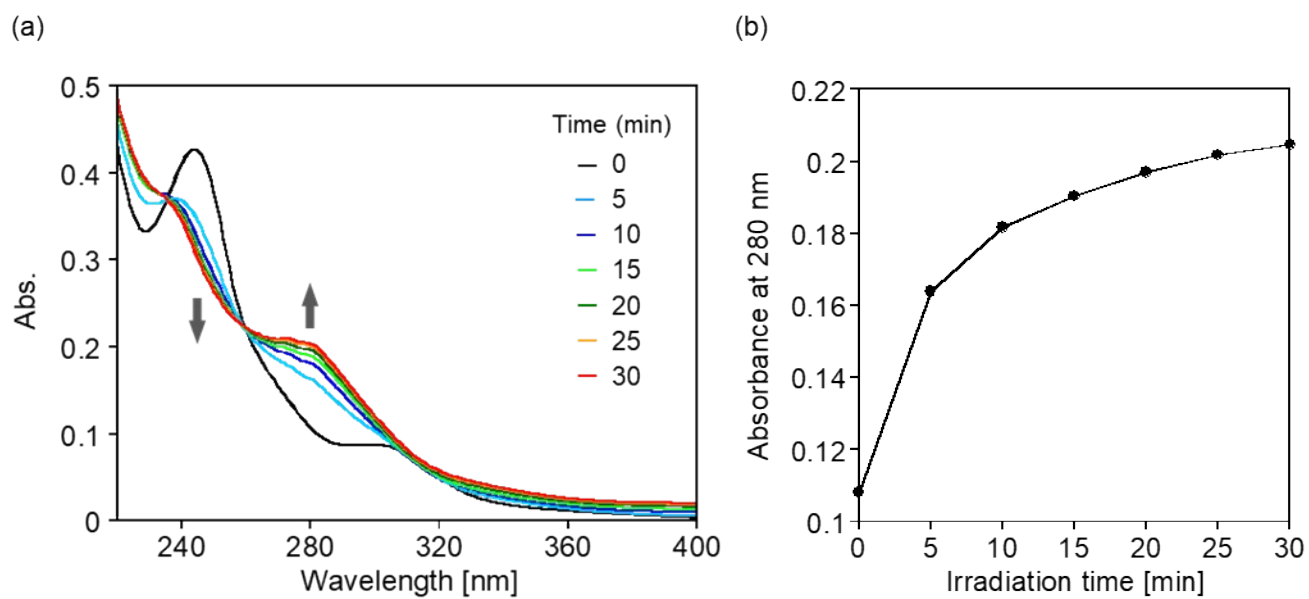

**Fig. S3** (a) UV-vis absorption spectra of NO<sub>2</sub>-DMBI-Ox in EtOH (0.02 mM) upon UV irradiation. (b) 254-nm UV irradiation time dependency of absorption peak intensities at 280 nm of ethanol solution of NO<sub>2</sub>-DMBI-Ox (0.02 mM).

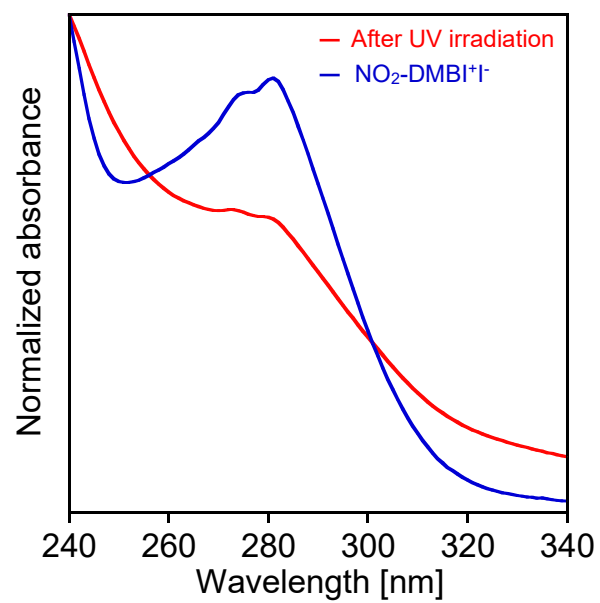

**Fig. S4** UV-vis absorption spectra of NO<sub>2</sub>-DMBI-Ox (red) after UV irradiation and NO<sub>2</sub>-DMBI<sup>+</sup>I<sup>-</sup> (blue) in EtOH.

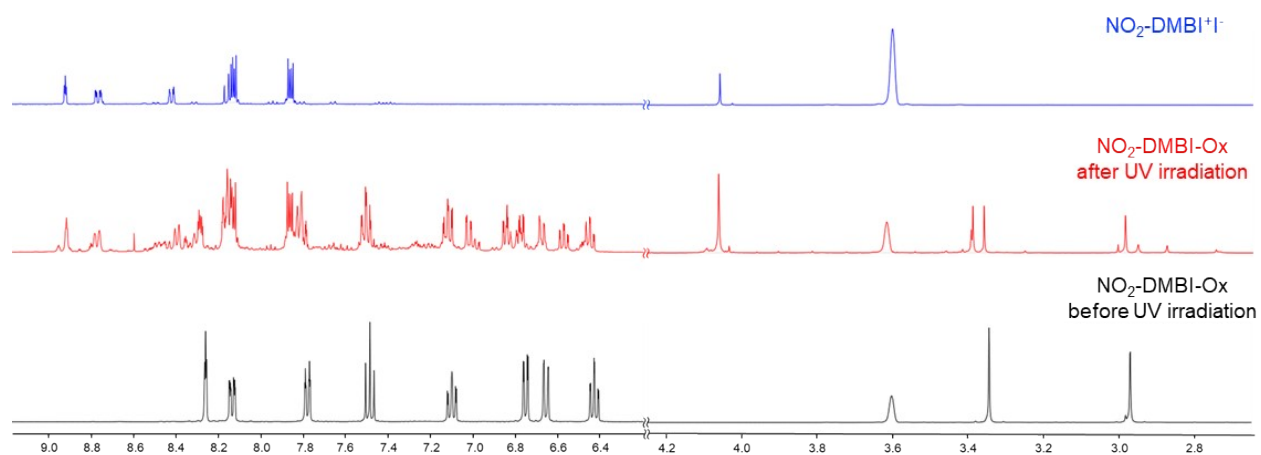

**Fig. S5**  $^1\text{H}$  NMR spectra of  $\text{NO}_2\text{-DMBI}^+\text{I}^-$  (blue) and  $\text{NO}_2\text{-DMBI-Ox}$  before (black) and after (red) UV irradiation for 72 hours in  $\text{EtOH-}d_3$  solution.

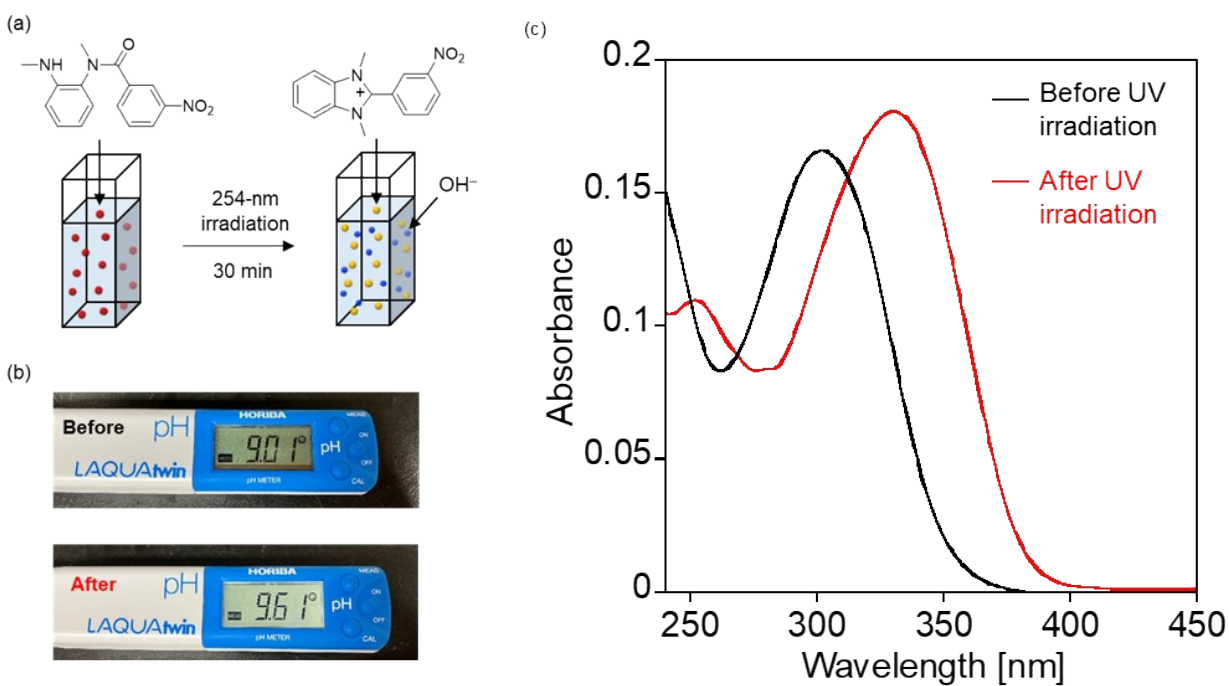

**Fig. S6** (a) Schematic illustration of photochemical reaction of NO<sub>2</sub>-DMBI-Ox in H<sub>2</sub>O and (b) the pH changes of the suspension of NO<sub>2</sub>-DMBI-Ox in H<sub>2</sub>O before and after UV irradiation. (c) UV-vis absorption spectra of NO<sub>2</sub>-DMBI-Ox in H<sub>2</sub>O before (black) and after (red) UV irradiation.

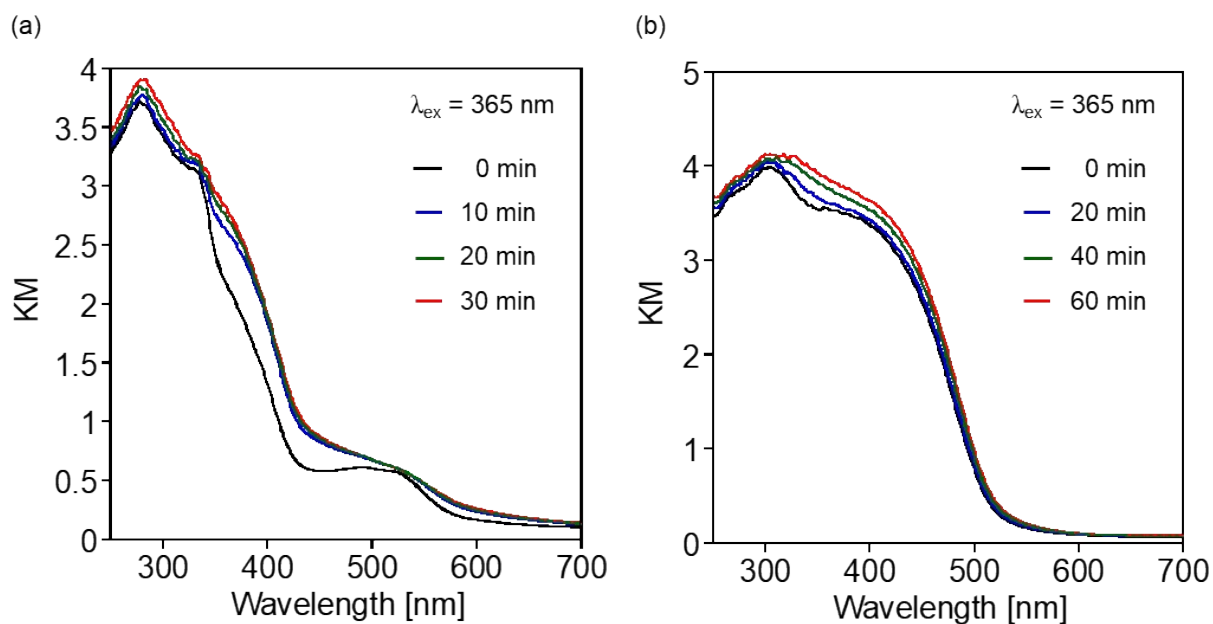

**Fig. S7** Diffuse reflectance spectra of (a) N-DMBI-Ox and (b) NO<sub>2</sub>-DMBI-Ox upon UV irradiation. The Kubelka-munk function (KM) was calculated based on the kubelka-munk equation ( $KM = (1-R)^2/2R$ ), where R is the relative reflectance of samples using barium sulfate as a standard sample by an integration sphere instrument.



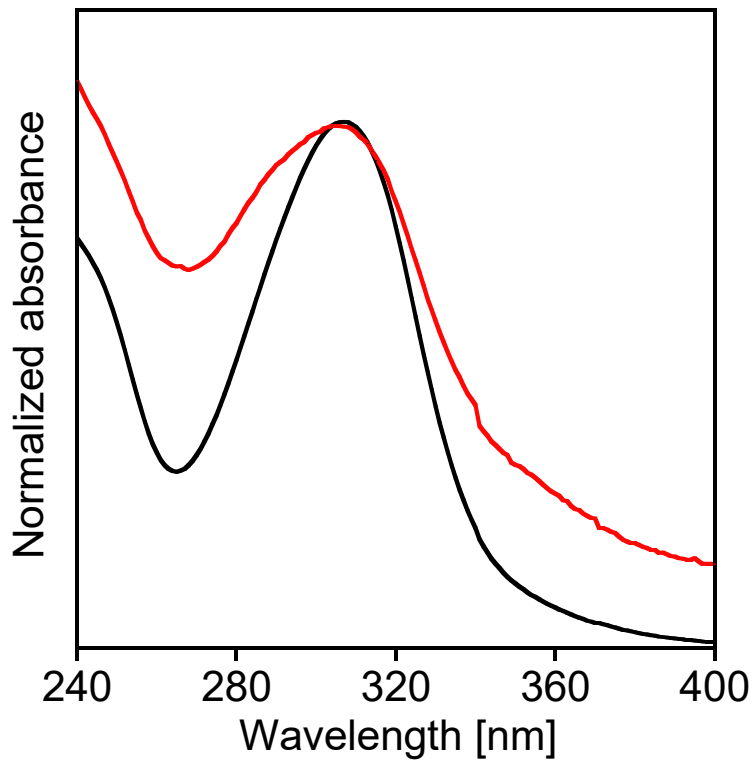

**Fig. S8** UV-vis absorption spectra of extracted products (red) from SWCNT sheet after dipping in EtOH solution of N-DMBI-Ox (1.0 mM) and N-DMBI-Ox (black).

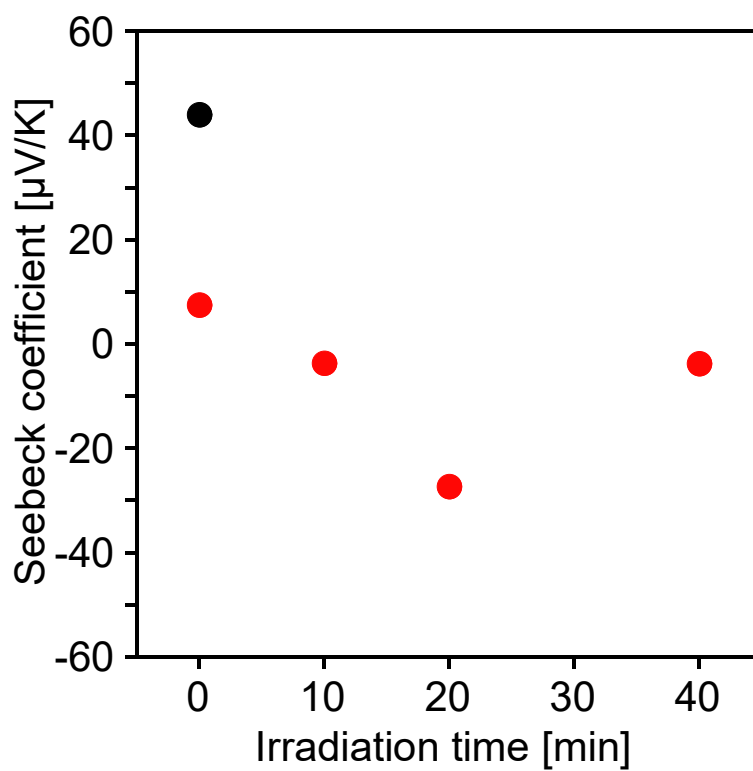

**Fig. S9** Irradiation time dependency of Seebeck coefficient of the SWCNT sheets dipped with 1.0 mM of N-DMBI-Ox solutions (red) and pristine SWCNT (black).

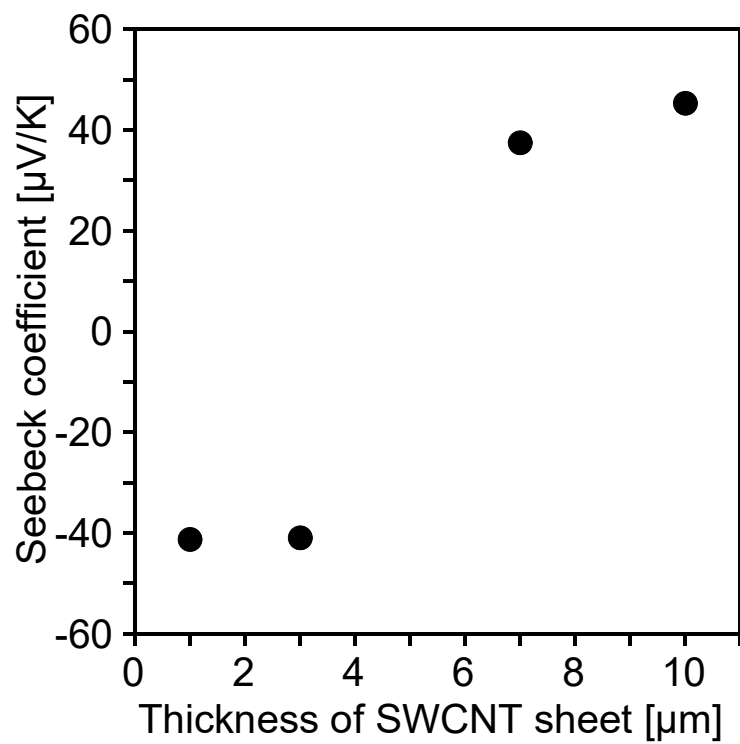

**Fig. S10** Thickness dependency of Seebeck coefficient of SWCNT dipped with 1.0 mM of  $\text{NO}_2^-$ -DMBI-Ox solutions after UV irradiation at 365 nm for 20 min.

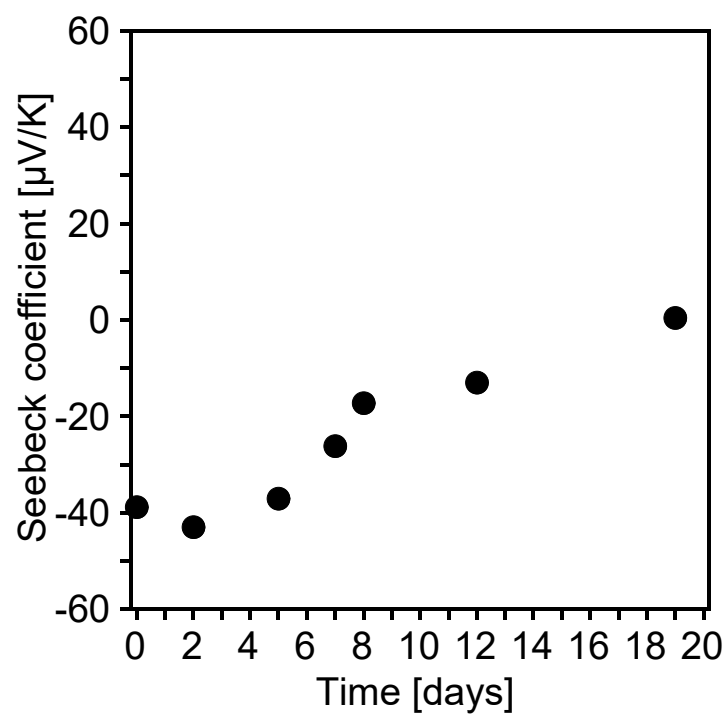

**Fig. S11** Time course of the Seebeck coefficient of SWCNT sheets dipped with 1.0 mM of  $\text{NO}_2^-$ -DMBI-Ox solutions after UV irradiation at 365 nm for 20 min.

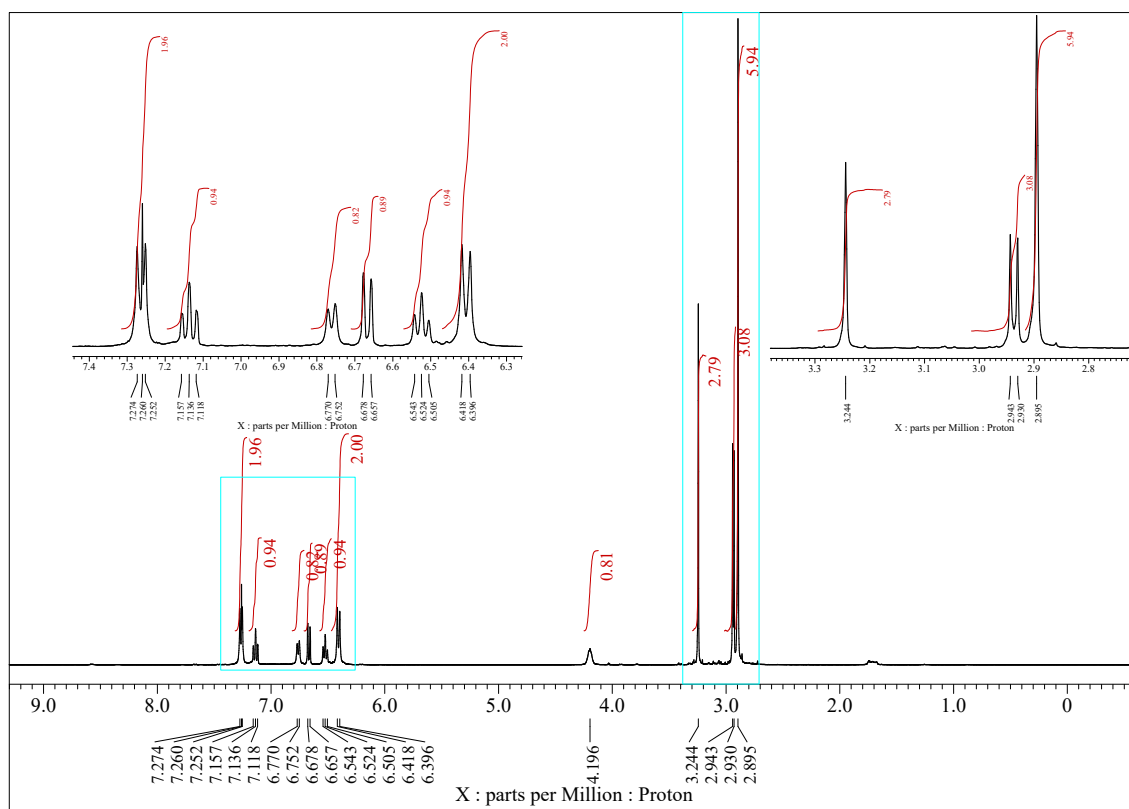

Fig. S12  $^1\text{H}$  NMR spectrum of N-DMBI-Ox (400 MHz,  $\text{CDCl}_3$ , 25  $^\circ\text{C}$ ).

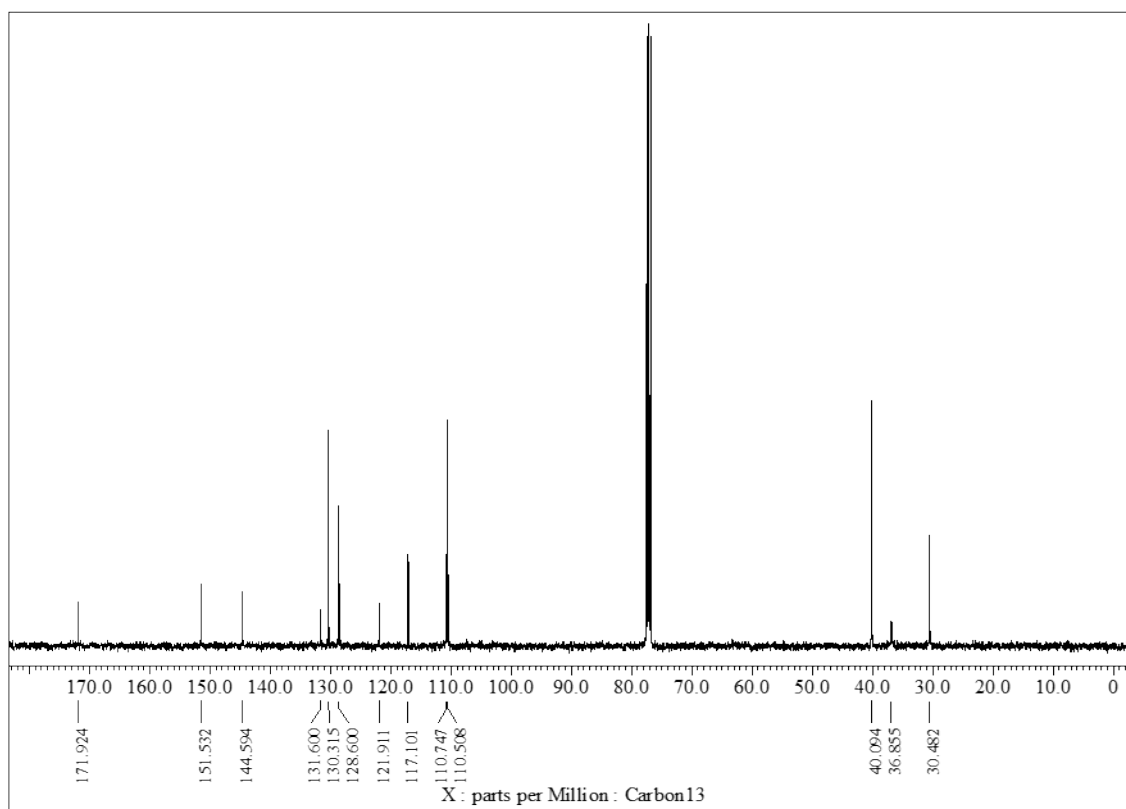

**Fig. S13**  $^{13}\text{C}$  NMR spectrum of N-DMBI-Ox (100 MHz,  $\text{CDCl}_3$ , 25 °C).

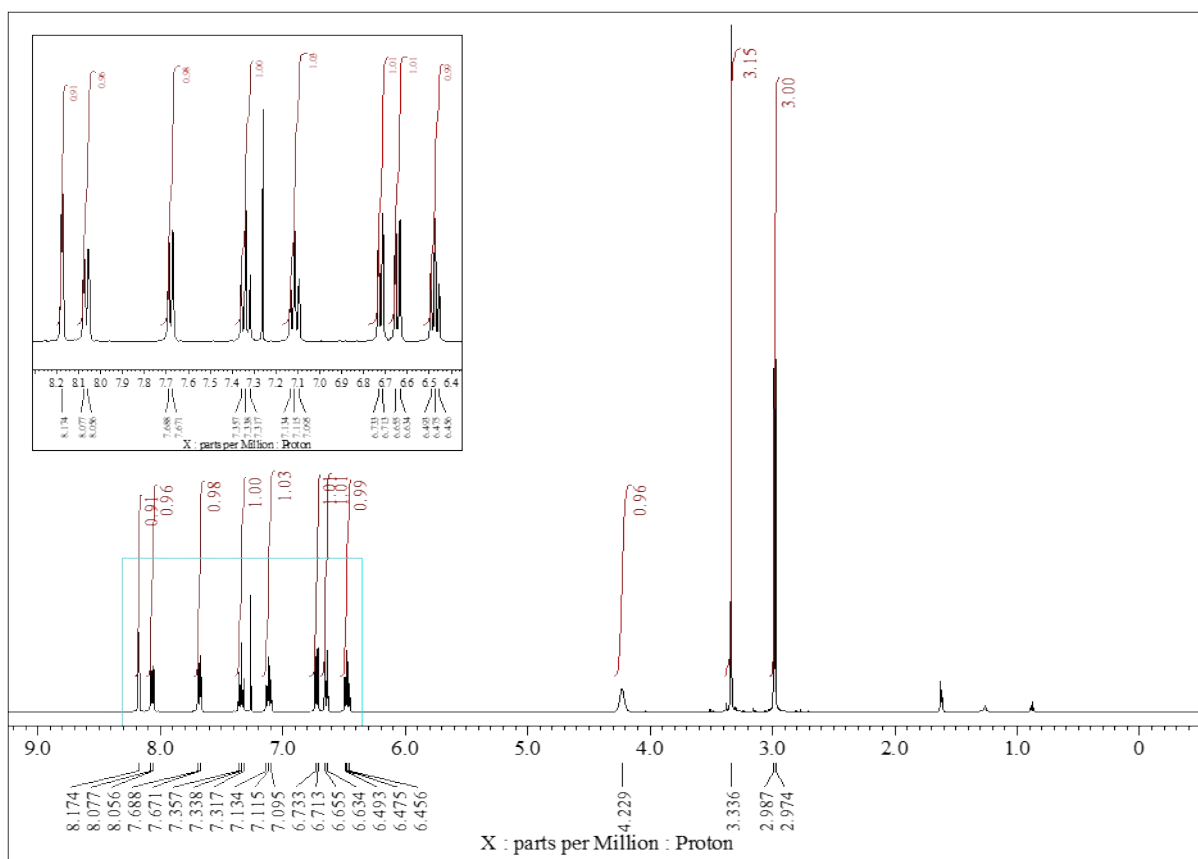

**Fig. S14**  $^1\text{H}$  NMR spectrum of  $\text{NO}_2\text{-DMBI-Ox}$  (400 MHz,  $\text{CDCl}_3$ ,  $25^\circ\text{C}$ ).

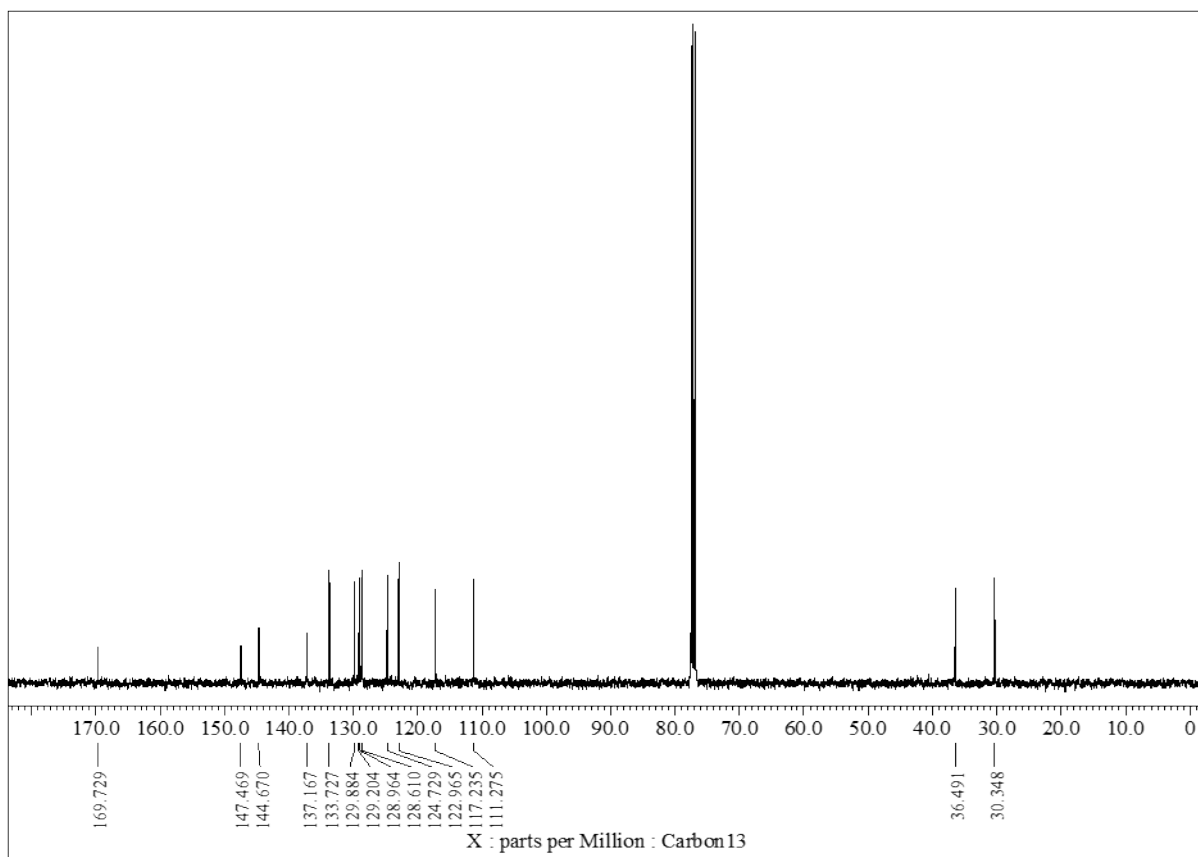

**Fig. S15** <sup>13</sup>C NMR spectrum of NO<sub>2</sub>-DMBI-Ox (100 MHz, CDCl<sub>3</sub>, 25 °C).
